# Supplementary material for: Hydrogenation of diamond nanowire surfaces for effective electrostatic charge storage
Source: Royal Society of Chemistry journal article supplement (doi:10.1039/d1nr00189b), 2021-01-01
Supplement: d1nr00189b1.pdf [file d1nr00189b1.pdf]

Supporting Information for

**Hydrogenation of diamond nanowire surfaces for effective  
electrostatic charge storage**

Kalpataru Panda<sup>a,b\*</sup>, Jae-Eun Kim<sup>a</sup>, Kamatchi Jothiramalingam Sankaran<sup>c,d</sup>, I-  
Nan Lin<sup>e</sup>, Ken Haenen<sup>c,d</sup>, Georg S. Duesberg<sup>b</sup>, Jeong Young Park<sup>a,f\*</sup>

<sup>a</sup>Department of Chemistry, Korea Advanced Institute of Science and Technology (KAIST),  
Daejeon, 34141, South Korea

<sup>b</sup>Institute of Physics, EIT 2, Faculty of Electrical Engineering and Information Technology,  
Universität der Bundeswehr München, Werner-Heisenberg-Weg 39, 85577 Neubiberg,  
Germany

<sup>c</sup>Institute for Materials Research (IMO), Hasselt University, 3590 Diepenbeek, Belgium

<sup>d</sup>IMOMECA, IMEC vzw, 3590 Diepenbeek, Belgium

<sup>e</sup>Department of Physics, Tamkang University, 251 Tamsui, Taiwan, Republic of China

<sup>f</sup>Center for Nanomaterials and Chemical Reactions, Institute for Basic Science (IBS),  
Daejeon, 34141, South Korea

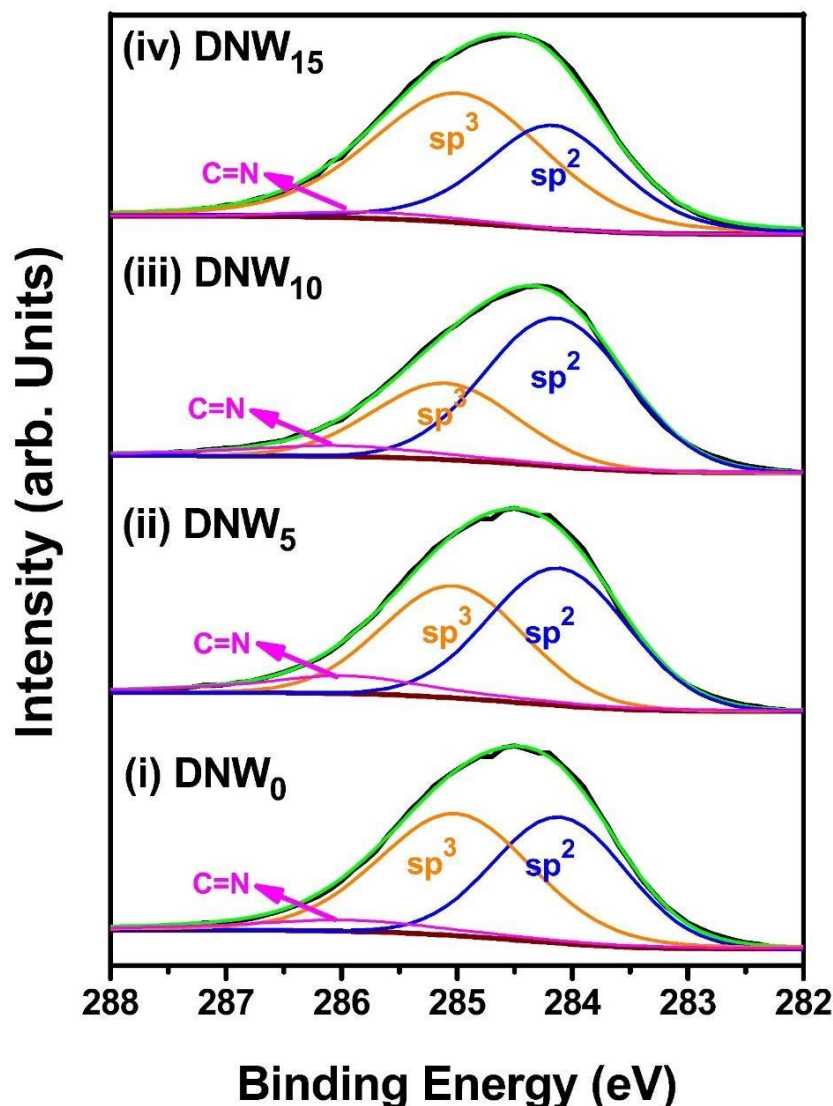

**Figure S1.** XPS spectra of (i) pristine and (ii, iii, iv) H<sub>2</sub> plasma-treated DNW films for (ii) 5, (iii) 10, and (iv) 15 min. The data are fitted to Lorentzian peaks with binding energies at 284.1, 285.2 and 286.0 eV corresponding to sp<sup>2</sup> C=C, sp<sup>3</sup> C–C and C=N bonding and their relative intensities are tabulated in Table I. In the DNW<sub>0</sub> film, the sp<sup>3</sup> C–C bonding is predominant with a peak intensity of 50.7%, while the sp<sup>2</sup> C=C peak intensity is 40.9% (curve i, Figure S1). The C=N peak is seen with an intensity of 8.4% at a binding energy of 286 eV. The appearance of C=N is not surprising because the films were grown in a N<sub>2</sub> containing plasma. The significant increase observed in the sp<sup>2</sup> phase fraction is caused by the H<sub>2</sub> plasma treatment (i.e., the sp<sup>2</sup> C=C peak intensity increases to 48.1% for the DNW<sub>5</sub> films (curve ii, Figure S1) and to 63.9% for the DNW<sub>10</sub> films (curve iii, Figure S1)). However, extended H<sub>2</sub> plasma treatment removes the

graphitic phase content from the surface (curve iv, Figure S1) thereby decreasing the  $sp^2$  phase fraction to 35.9%.

**Table I. Relative intensities of the various components of the C1s XPS spectra from the pristine DNW<sub>0</sub> and the H<sub>2</sub> plasma-treated DNW films.**

| Peak position (eV) | Chemical bond | Peak intensity (%) |                  |                   |                   |
|--------------------|---------------|--------------------|------------------|-------------------|-------------------|
|                    |               | DNW <sub>0</sub>   | DNW <sub>5</sub> | DNW <sub>10</sub> | DNW <sub>15</sub> |
| 284.1              | $sp^2$ C=C    | 40.9               | 48.1             | 63.9              | 35.9              |
| 285.2              | $sp^3$ C-C    | 50.7               | 40.1             | 29.2              | 58.9              |
| 286.0              | C=N           | 8.4                | 11.8             | 6.9               | 5.2               |

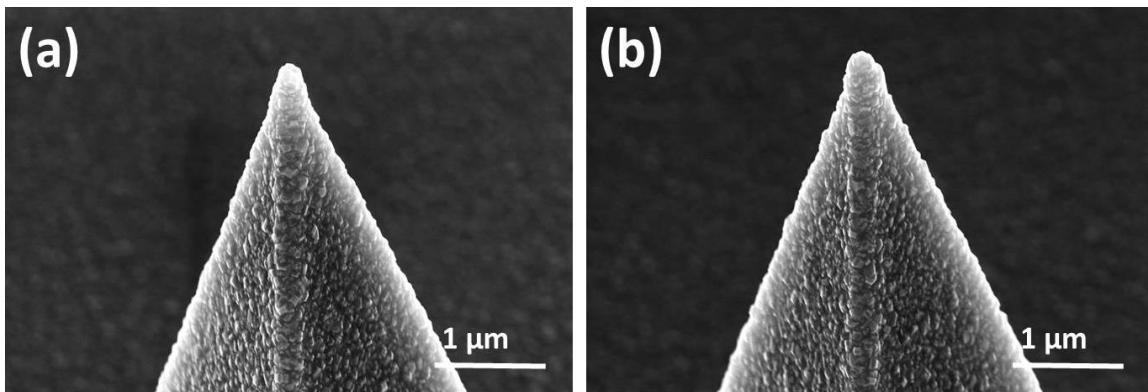

**Figure S2.** FESEM images of the diamond-coated Si tip (a) before and (b) after the load-dependent charge storage experiments on the DNW surface where the same tip was used many times. This indicates that the diamond-coated Si tips are stiff enough and did not change size because of the high load. Even a high bias of  $\pm 10$  V did not change the tip.

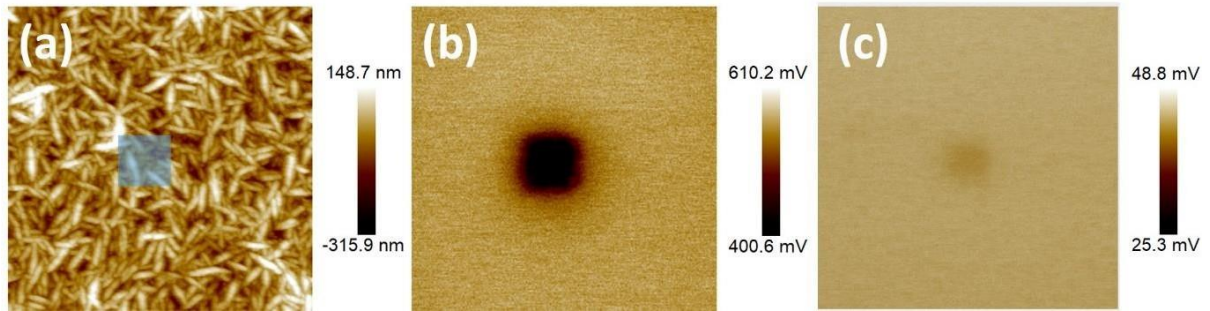

**Figure S3.** (a) Surface topography of the DNW<sub>10</sub> surface that was written with a tip bias of  $-1$  V in the marked square. (b) The corresponding KPFM potential signal clearly shows a negative potential shift. After reversing the tip polarity to  $+1$  V, the same area was written again (all other parameters were the same as the first writing procedure at  $-1$  V). (c) After the writing process at  $+1$  V, the corresponding KPFM potential signal at the same position shows that the trapped charge can be erased by applying an exact opposite bias to the AFM tip. This indicates that the DNW surface can be rewritten. It is noted that there is still a small residual charge left on the writing area. Image sizes: (a, b, c)  $4\ \mu\text{m}$ .
